# Supplementary material
Source: Springer Nature journal article supplement (http://www.springermedizin.de/resource/supplementary/12913_2010_1649_MOESM2_ESM.pdf/9528644)

## Surgical Cohort

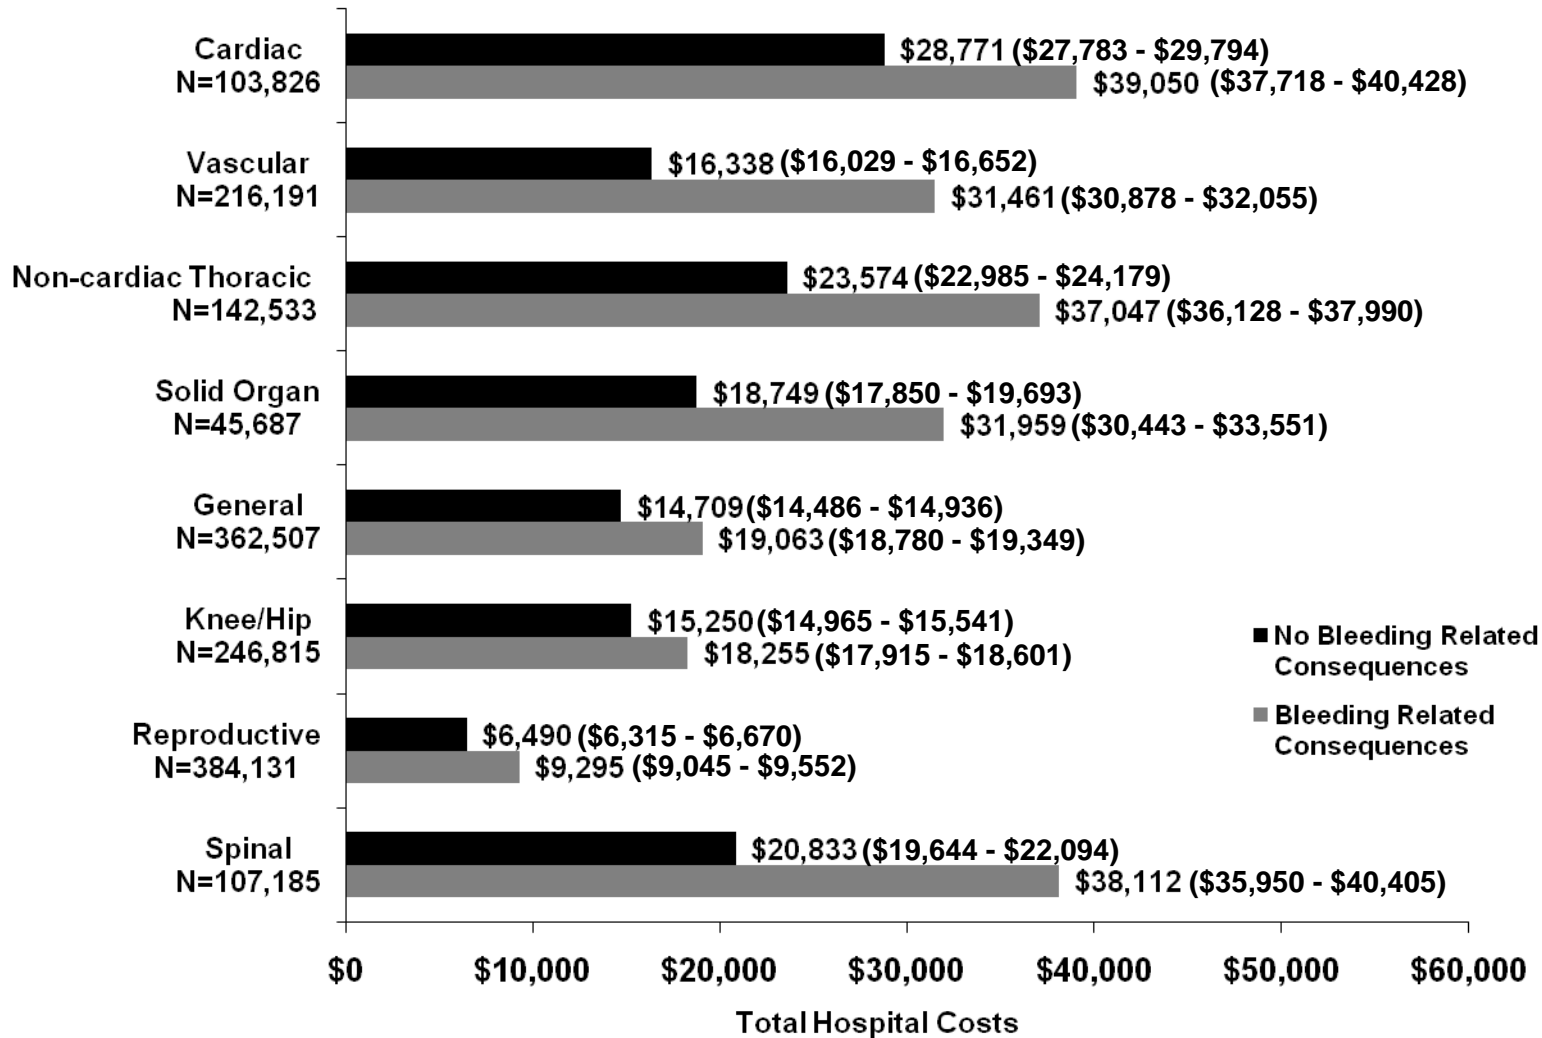

Supplement: MOESM2 [file 9528644]
